# Supplementary material
Source: publisher figshare collection journal article supplement (https://sage.figshare.com/ndownloader/files/18169511)
Supplement: Supplementary file 1 [file 18169511]

## Sheet: Sheet1
Variable #	Variable name	1	2	3	4	5	6	7	8	9	10	11	12	13	14	15	16	17	18	19	20	21	22	23	24	25	26	27	28	29	30	31	32	33	34	35	36	37	38	39	40	41	42	43	44	45	46	47	48
1	Individual bargaining	1
2	Only company bargaining	-0.357	1
3	Only sectoral bargaining	-0.327	-0.195	1
4	Only national bargaining	-0.256	-0.152	-0.139	1
5	Single-level bargaining	-0.666	0.536	0.492	0.384	1
6	Multi-level bargaining	-0.388	-0.23	-0.211	-0.165	-0.43	1
7	Governed multi-level bargaining	-0.218	-0.13	-0.119	-0.093	-0.242	0.563	1
8	Ungoverned multi-level bargaining	-0.295	-0.175	-0.161	-0.126	-0.327	0.762	-0.107	1
9	Member of an employers‘ organisation	-0.374	-0.022	0.199	0.059	0.162	0.252	0.24	0.115	1
10	Union representation in company	-0.308	0.182	-0.005	-0.012	0.129	0.213	0.123	0.16	0.293	1
11	Works council present	-0.246	0.072	0.08	-0.005	0.111	0.161	0.105	0.112	0.284	0.312	1
12	NACE6 Industry	-0.051	0.074	-0.012	-0.001	0.048	0.003	-0.014	0.015	0.055	0.091	0.104	1
13	NACE6 Construction	0.017	-0.039	0.017	-0.007	-0.021	0.006	0.002	0.005	-0.004	-0.042	-0.045	-0.222	1
14	NACE6 Commerce and hospitality	0.034	-0.033	0.015	0.004	-0.012	-0.025	-0.023	-0.013	-0.079	-0.106	-0.107	-0.411	-0.177	1
15	NACE6 Transport and communication	-0.035	0.021	0.015	-0.011	0.02	0.017	-0.003	0.022	0.034	0.047	0.005	-0.194	-0.084	-0.154	1
16	NACE6 Financial services and real estate	-0.005	0.003	0	-0.022	-0.011	0.019	0.031	-0.002	0.043	0.033	0.033	-0.15	-0.065	-0.12	-0.057	1
17	NACE6 Other services	0.035	-0.038	-0.023	0.02	-0.034	-0.001	0.025	-0.02	-0.02	-0.009	0.004	-0.376	-0.162	-0.3	-0.141	-0.11	1
18	10 -49 employees	0.141	-0.108	0.006	0.04	-0.055	-0.103	-0.071	-0.068	-0.21	-0.302	-0.358	-0.161	0.074	0.161	-0.044	-0.025	0.005	1
19	50-249 employees	-0.05	0.036	-0.01	-0.016	0.011	0.046	0.037	0.027	0.084	0.139	0.171	0.066	-0.032	-0.071	0.021	0.007	0.004	-0.728	1
20	250+ employees	-0.132	0.104	0.005	-0.035	0.062	0.083	0.05	0.06	0.184	0.24	0.277	0.139	-0.061	-0.132	0.034	0.025	-0.013	-0.448	-0.287	1
21	Private sector company	0.032	-0.054	0.037	-0.01	-0.021	-0.013	-0.019	0	-0.034	-0.173	-0.079	0.057	0.044	0.118	-0.046	-0.065	-0.159	0.075	-0.044	-0.047	1
22	Public sector company	-0.032	0.054	-0.037	0.01	0.021	0.013	0.019	0	0.034	0.173	0.079	-0.057	-0.044	-0.118	0.046	0.065	0.159	-0.075	0.044	0.047	-1	1
23	Single establishment company	0.148	-0.003	-0.059	0.004	-0.043	-0.126	-0.124	-0.054	-0.201	-0.172	-0.215	0.059	0.082	-0.04	-0.015	-0.053	-0.047	0.15	-0.085	-0.098	0.016	-0.016	1
24	Headquarters	-0.106	-0.02	0.063	0.005	0.033	0.087	0.107	0.021	0.142	0.094	0.144	-0.059	-0.054	0.012	0.002	0.052	0.066	-0.14	0.075	0.098	-0.011	0.011	-0.764	1
25	Subsidiary site	-0.083	0.03	0.007	-0.013	0.021	0.075	0.046	0.054	0.118	0.136	0.136	-0.011	-0.052	0.045	0.02	0.011	-0.017	-0.041	0.03	0.019	-0.01	0.01	-0.505	-0.171	1
26	Percentage of employees with open ended contract: None at all	0.041	-0.018	-0.021	-0.016	-0.039	-0.002	0.023	-0.02	-0.011	-0.014	-0.031	-0.016	0.004	0.031	-0.002	-0.003	-0.015	0.069	-0.033	-0.054	0	0	0.029	-0.026	-0.009	1
27	Percentage of employees with open ended contract: Less than 20%	0.012	-0.007	0.004	-0.014	-0.011	-0.001	-0.01	0.007	-0.013	-0.01	-0.004	-0.001	-0.007	0	-0.015	-0.015	0.022	-0.033	0.035	0.001	-0.006	0.006	0.005	-0.009	0.004	-0.03	1
28	Percentage of employees with open ended contract: 20% to 39%	0.009	-0.008	-0.002	0.001	-0.007	-0.002	-0.008	0.004	-0.03	-0.029	-0.014	-0.027	0.007	0.011	-0.009	-0.016	0.029	-0.014	0.001	0.018	-0.01	0.01	0.012	-0.024	0.013	-0.024	-0.035	1
29	Percentage of employees with open ended contract: 40% to 59%	0.018	-0.001	-0.012	-0.013	-0.018	0	-0.008	0.006	-0.031	-0.022	-0.025	-0.048	0.009	0.026	0.015	-0.029	0.027	0.001	0.005	-0.008	0.011	-0.011	0.003	-0.012	0.012	-0.03	-0.045	-0.035	1
30	Percentage of employees with open ended contract: 60% to 79%	-0.033	0.034	0.005	-0.005	0.026	0.008	-0.008	0.016	0.017	0.014	0.045	-0.013	0	-0.002	0.007	-0.025	0.025	-0.058	0.02	0.056	0.003	-0.003	-0.025	0.006	0.03	-0.044	-0.065	-0.051	-0.066	1
31	Percentage of employees with open ended contract: 80% to 99%	-0.094	0.065	0.008	-0.003	0.054	0.047	0.044	0.022	0.115	0.148	0.161	0.077	-0.041	-0.077	-0.004	0.051	-0.001	-0.263	0.13	0.198	-0.074	0.074	-0.086	0.089	0.013	-0.114	-0.167	-0.132	-0.17	-0.247	1
32	Percentage of employees with open ended contract: All	0.086	-0.074	0	0.021	-0.044	-0.05	-0.036	-0.032	-0.093	-0.129	-0.161	-0.035	0.037	0.056	0.004	-0.013	-0.039	0.294	-0.148	-0.218	0.073	-0.073	0.085	-0.068	-0.039	-0.115	-0.168	-0.133	-0.171	-0.248	-0.64	1
33	Percentage of employees who are women: None at all	0.014	-0.026	0.009	0.015	-0.005	-0.011	-0.013	-0.003	-0.021	-0.036	-0.042	-0.007	0.089	-0.027	0.043	-0.023	-0.04	0.104	-0.071	-0.053	0.022	-0.022	0.025	-0.045	0.021	0.031	0.022	0.009	-0.004	-0.011	-0.057	0.044	1
34	Percentage of employees who are women: Less than 20%	-0.018	0.008	0.008	-0.003	0.01	0.009	0.009	0.004	0.009	-0.023	-0.014	0.102	0.261	-0.151	0.116	-0.115	-0.153	0.025	0.011	-0.05	0.068	-0.068	0.102	-0.101	-0.02	0.003	0.006	0.002	0	-0.029	-0.04	0.053	-0.092	1
35	Percentage of employees who are women: 20% to 39%	-0.023	0.022	-0.007	0.002	0.013	0.012	0.007	0.009	0.006	0.015	0.027	0.063	-0.042	0.01	0.004	-0.044	-0.035	-0.009	-0.017	0.034	-0.002	0.002	-0.025	0.036	-0.01	-0.012	-0.014	-0.029	-0.011	-0.004	0.02	0.005	-0.075	-0.364	1
36	Percentage of employees who are women: 40% to 59%	0	0.001	-0.016	-0.009	-0.017	0.02	0.014	0.014	0.03	0.032	0.031	-0.061	-0.122	0.047	-0.041	0.103	0.079	-0.073	0.034	0.058	-0.035	0.035	-0.075	0.076	0.013	-0.003	-0.005	-0.005	-0.002	0.028	0.041	-0.051	-0.073	-0.353	-0.289	1
37	Percentage of employees who are women: 60% to 79%	0.002	-0.014	0.008	0.01	0.002	-0.005	-0.001	-0.005	-0.011	0.006	0.003	-0.09	-0.113	0.082	-0.068	0.089	0.093	-0.017	0.015	0.004	-0.032	0.032	-0.027	0.034	-0.004	-0.007	-0.006	0.028	0.018	0.008	0.019	-0.035	-0.055	-0.264	-0.216	-0.21	1
38	Percentage of employees who are women: 80% to 99%	0.044	-0.017	0.01	-0.002	-0.007	-0.045	-0.033	-0.028	-0.037	-0.012	-0.037	-0.053	-0.088	0.064	-0.067	0.005	0.093	0.027	-0.013	-0.022	-0.028	0.028	0.001	-0.013	0.016	0.011	0.017	0.007	0	0.012	-0.011	-0.008	-0.041	-0.198	-0.162	-0.157	-0.117	1
39	Percentage of employees who are women: All	0.033	-0.003	-0.009	-0.005	-0.012	-0.025	-0.015	-0.018	-0.026	-0.026	-0.035	-0.029	-0.025	0.05	-0.023	0.004	0.01	0.071	-0.046	-0.039	-0.009	0.009	-0.001	-0.019	0.026	0.003	-0.002	0.01	-0.003	-0.01	-0.028	0.032	-0.013	-0.062	-0.051	-0.049	-0.037	-0.028	1
40	Percentage of employees older than 50: None at all	0.036	-0.031	-0.017	0.041	-0.011	-0.03	-0.046	0	-0.096	-0.095	-0.105	-0.094	0.004	0.096	-0.026	-0.024	0.033	0.198	-0.13	-0.107	0.052	-0.052	0.011	-0.031	0.024	0.035	0.01	0.018	0.025	-0.008	-0.08	0.054	0.04	-0.009	-0.016	-0.003	0.003	0.006	0.042	1
41	Percentage of employees older than 50: Less than 20%	0.055	-0.057	-0.001	0.015	-0.035	-0.024	-0.06	0.018	-0.055	-0.129	-0.087	-0.057	0.006	0.075	-0.02	-0.024	0.007	0.051	0.012	-0.088	0.112	-0.112	0.025	-0.019	-0.013	-0.009	0.014	0.035	0.042	0.002	-0.05	0.017	-0.011	0.016	-0.004	-0.002	0.008	-0.014	-0.021	-0.242	1
42	Percentage of employees older than 50: 20% to 39%	-0.062	0.034	0.022	-0.021	0.029	0.039	0.069	-0.007	0.085	0.088	0.104	0.065	0.002	-0.057	0.007	0.009	-0.025	-0.108	0.025	0.118	-0.02	0.02	-0.04	0.04	0.007	-0.017	-0.016	-0.027	-0.03	0.012	0.056	-0.03	-0.009	-0.009	0.026	0.02	-0.01	-0.037	-0.004	-0.177	-0.598	1
43	Percentage of employees older than 50: 40% to 59%	-0.03	0.043	-0.003	-0.015	0.022	0.009	0.028	-0.011	0.038	0.102	0.062	0.051	-0.004	-0.072	0.03	0.022	-0.01	-0.075	0.036	0.057	-0.121	0.121	-0.002	0.006	-0.005	0	0.001	-0.022	-0.029	-0.005	0.049	-0.028	0.005	0.001	-0.004	-0.018	-0.004	0.036	-0.001	-0.105	-0.353	-0.259	1
44	Percentage of employees older than 50: 60% to 79%	-0.004	0.03	-0.014	-0.008	0.009	-0.005	0	-0.006	0.004	0.062	0.014	0.018	-0.012	-0.043	0.019	0.026	0.009	-0.019	0.026	-0.008	-0.079	0.079	0.013	-0.012	-0.004	0.008	-0.01	-0.013	-0.018	-0.007	0.024	-0.006	-0.008	-0.01	-0.019	-0.002	0.007	0.045	-0.003	-0.053	-0.178	-0.13	-0.077	1
45	Percentage of employees older than 50: 80% to 99%	0.028	0.001	-0.018	-0.011	-0.019	-0.01	-0.002	-0.011	-0.011	0.004	-0.018	0.017	-0.012	-0.032	0	0.018	0.014	0.036	-0.024	-0.02	-0.032	0.032	0.013	-0.013	-0.002	0.011	-0.002	0.006	-0.003	-0.014	-0.021	0.026	-0.004	0.003	-0.005	-0.009	-0.005	0.019	0.016	-0.025	-0.084	-0.062	-0.036	-0.018	1
46	Percentage of employees older than 50: All	0.013	-0.009	-0.003	-0.01	-0.015	0.003	-0.002	0.005	-0.012	0.006	-0.006	-0.003	0.003	-0.001	-0.008	-0.006	0.01	0.011	-0.009	-0.003	-0.004	0.004	-0.003	0.002	0.002	0.021	-0.006	0.006	0.011	-0.003	-0.01	0.001	-0.004	0.003	-0.012	-0.003	0.004	0.004	0.036	-0.008	-0.027	-0.02	-0.012	-0.006	-0.003	1
47	Percentage of employees with university degrees: None at all	0.001	-0.067	0.027	0.077	0.014	-0.018	0.028	-0.044	-0.01	-0.1	-0.096	-0.027	0.066	0.074	0.038	-0.058	-0.086	0.247	-0.153	-0.146	0.062	-0.062	0.094	-0.098	-0.013	0.071	0.016	0.01	0.018	-0.035	-0.125	0.108	0.132	0.069	-0.047	-0.07	-0.033	0.019	0.058	0.077	0.003	-0.036	-0.011	-0.007	0.01	-0.001	1
48	Percentage of employees with university degrees: Less than 20%	-0.046	0.028	0.014	-0.013	0.024	0.026	0.015	0.02	0.046	0.036	0.056	0.168	0.023	-0.001	0.043	-0.077	-0.198	-0.136	0.105	0.052	0.043	-0.043	0.029	-0.042	0.011	-0.03	0.038	0.022	0.016	0.024	0.009	-0.044	-0.022	0.136	-0.021	-0.069	-0.054	-0.003	-0.036	-0.093	0.009	0.023	0.018	0.013	-0.001	-0.015	-0.366	1
49	Percentage of employees with university degrees: 20% to 39%	0.006	0.035	-0.014	-0.026	0.001	-0.009	-0.028	0.011	-0.013	0.041	0.018	0.016	-0.009	0	-0.021	0.028	-0.013	-0.035	-0.006	0.058	-0.023	0.023	-0.015	0.029	-0.016	-0.006	-0.016	-0.017	-0.023	0.008	0.04	-0.021	-0.03	-0.058	0.055	0.037	0.006	-0.037	-0.001	-0.006	-0.047	0.042	0.014	0.01	-0.01	-0.005	-0.181	-0.455
50	Percentage of employees with university degrees: 40% to 59%	0.017	0.004	-0.009	-0.019	-0.015	-0.002	-0.008	0.004	-0.005	0.014	0.001	-0.074	-0.038	0.006	-0.018	0.058	0.088	-0.008	-0.001	0.012	-0.042	0.042	-0.056	0.059	0.007	-0.003	-0.029	-0.005	-0.012	0.006	0.027	-0.011	-0.028	-0.083	0.001	0.055	0.051	0.006	0.002	0.015	-0.008	0.006	0.003	-0.02	0.006	-0.009	-0.113	-0.285
51	Percentage of employees with university degrees: 60% to 79%	0.005	0.004	-0.02	-0.004	-0.014	0.011	-0.006	0.018	-0.009	0.022	0.017	-0.097	-0.031	-0.043	-0.04	0.054	0.177	-0.028	0.015	0.019	-0.055	0.055	-0.061	0.068	0.002	-0.013	-0.025	-0.01	0.001	0.001	0.037	-0.021	-0.028	-0.098	0.014	0.058	0.048	0.013	-0.012	0.001	0.009	-0.005	-0.011	0.008	-0.005	0.008	-0.092	-0.232
52	Percentage of employees with university degrees: 80% to 99%	0.051	-0.019	-0.021	-0.01	-0.036	-0.017	-0.007	-0.015	-0.031	-0.023	-0.026	-0.129	-0.041	-0.053	-0.038	0.06	0.226	-0.002	0.009	-0.009	-0.039	0.039	-0.042	0.045	0.004	-0.01	-0.025	-0.018	-0.007	-0.011	0.042	-0.014	-0.032	-0.085	0.006	0.059	0.044	0.008	-0.008	0.034	0.05	-0.048	-0.027	-0.012	0.005	-0.007	-0.094	-0.236
53	Percentage of employees with university degrees: All	0.022	-0.02	0.009	-0.005	-0.012	-0.012	-0.004	-0.012	-0.033	-0.029	-0.012	-0.069	-0.02	-0.028	-0.022	0.036	0.12	0.063	-0.036	-0.041	0.001	-0.001	-0.011	0.003	0.012	-0.001	0.009	0.001	-0.002	-0.02	-0.032	0.041	0	-0.029	-0.001	0.01	0.005	0.022	0.023	0.087	0.006	-0.041	-0.017	-0.013	-0.003	0.092	-0.05	-0.126
54	Percentage of employees working part-time: None at all	0.095	-0.009	-0.033	-0.024	-0.045	-0.06	-0.103	0.009	-0.133	-0.07	-0.16	0.041	0.073	0.003	0.017	-0.033	-0.095	0.199	-0.104	-0.143	0.03	-0.03	0.086	-0.087	-0.014	0.037	-0.003	-0.007	-0.019	-0.06	-0.147	0.182	0.109	0.102	-0.013	-0.066	-0.059	-0.039	0.014	0.08	0.049	-0.068	-0.033	-0.016	0.011	-0.005	0.043	-0.024
55	Percentage of employees working part-time: Less than 20%	-0.056	0.031	0.008	0.006	0.033	0.028	0.058	-0.012	0.099	0.103	0.112	0.099	0.005	-0.094	0.002	0.01	-0.024	-0.197	0.115	0.125	-0.021	0.021	-0.041	0.063	-0.022	-0.034	-0.012	-0.044	-0.057	-0.013	0.172	-0.111	-0.078	0.057	0.054	-0.007	-0.049	-0.055	-0.038	-0.094	-0.021	0.052	0.027	0.012	-0.015	0.005	-0.077	0.039
56	Percentage of employees working part-time: 20% to 39%	-0.037	-0.017	0.028	0.009	0.013	0.029	0.041	0.003	0.041	-0.026	0.057	-0.089	-0.052	0.047	-0.005	0.049	0.068	0.013	-0.022	0.01	-0.01	0.01	-0.04	0.038	0.01	-0.015	-0.014	-0.008	0.03	0.072	-0.008	-0.033	-0.025	-0.127	0.013	0.082	0.06	0.006	0.005	-0.011	-0.034	0.041	0.01	-0.013	-0.002	-0.004	0.016	-0.025
57	Percentage of employees working part-time: 40% to 59%	-0.015	-0.008	-0.002	0.005	-0.004	0.023	0.033	0.002	0.009	-0.031	0.013	-0.095	-0.047	0.073	-0.007	0.004	0.067	0.006	-0.007	0.001	-0.013	0.013	-0.017	0.006	0.018	0	0.001	0.046	0.092	0.042	-0.028	-0.051	-0.013	-0.087	-0.044	0.052	0.064	0.06	0.006	0.015	0.004	-0.011	-0.003	0.003	0	-0.006	0.008	0.001
58	Percentage of employees working part-time: 60% to 79%	-0.021	-0.003	0.012	0.02	0.018	0.003	0.013	-0.007	0	-0.018	-0.001	-0.086	-0.046	0.082	-0.028	-0.012	0.068	0.004	-0.009	0.007	0.004	-0.004	-0.027	-0.005	0.047	-0.004	0.011	0.079	0.049	0.029	-0.033	-0.034	-0.015	-0.08	-0.059	0.017	0.095	0.082	0.021	0.023	-0.003	-0.007	-0.014	0.019	-0.001	-0.005	0.024	0.003
59	Percentage of employees working part-time: 80% to 99%	0.004	-0.034	0.015	0.014	-0.007	0.004	-0.001	0.006	0.004	-0.011	0.006	-0.076	-0.035	0.032	-0.016	-0.021	0.097	-0.009	0.005	0.007	0.004	-0.004	-0.008	-0.011	0.026	0.015	0.063	0.04	0.028	0.009	-0.022	-0.038	-0.01	-0.068	-0.049	-0.008	0.049	0.134	0.035	0.039	-0.014	-0.018	0.011	0.007	0.009	-0.004	0.048	-0.003
60	Percentage of employees working part-time: All	0.008	-0.001	-0.002	-0.008	-0.007	-0.002	-0.016	0.01	-0.031	-0.022	-0.029	-0.009	0.002	0.01	0.003	0.002	-0.005	0.033	-0.018	-0.024	0.005	-0.005	0.014	-0.019	0.003	0.04	0.02	0.014	-0.009	-0.005	-0.031	0.013	0.027	-0.005	-0.007	-0.017	0.006	0.017	0.024	0.02	-0.009	-0.016	0.004	0.008	0.024	0.045	0.034	-0.012
61	Percentage of employees working in jobs that require at least one year of on the job learning to become proficient:None at all	0.147	-0.002	-0.072	-0.01	-0.06	-0.105	-0.098	-0.049	-0.154	-0.063	-0.125	-0.053	-0.005	0.05	0.05	-0.009	-0.014	0.097	-0.04	-0.083	-0.021	0.021	0.109	-0.093	-0.043	0.036	0.015	0.011	0.018	-0.005	-0.091	0.066	0.002	-0.016	-0.032	-0.012	0.018	0.06	0.037	0.029	0.015	-0.04	-0.004	0.014	0.029	-0.003	0.06	0.012
62	Percentage of employees working in jobs that require at least one year of on the job learning to become proficient:Less than 20%	-0.043	0.03	-0.007	0.009	0.023	0.023	-0.001	0.029	0.044	0.091	0.057	0.033	-0.001	-0.007	0.009	-0.013	-0.029	-0.125	0.081	0.07	-0.001	0.001	-0.019	0.005	0.021	-0.017	0.027	0.025	0.023	0.037	0.046	-0.091	-0.017	0.001	-0.011	0.006	0.008	0.006	-0.006	-0.035	0.005	0.004	0.011	0.012	-0.014	0.001	-0.03	0.077
63	Percentage of employees working in jobs that require at least one year of on the job learning to become proficient:20% to 39%	-0.037	0.012	0.008	-0.013	0.007	0.036	0.036	0.015	0.026	0.026	0.041	0.034	-0.016	0.011	-0.024	-0.021	-0.014	-0.037	0.006	0.045	0.005	-0.005	-0.03	0.042	-0.011	-0.002	0.009	0.002	0.006	0.027	0.025	-0.047	-0.015	-0.017	0.022	0.023	0.002	-0.031	-0.015	-0.002	-0.03	0.021	0.02	-0.002	-0.002	-0.006	-0.037	0.004
64	Percentage of employees working in jobs that require at least one year of on the job learning to become proficient:40% to 59%	-0.031	0.003	0.01	-0.011	0.003	0.034	0.035	0.014	0.043	0.008	0.04	0.04	-0.022	-0.005	-0.022	0.004	-0.014	-0.023	0.013	0.015	0.001	-0.001	-0.047	0.033	0.028	-0.009	-0.019	0.003	-0.018	0.013	0.023	-0.014	-0.014	-0.019	0.042	0.013	-0.004	-0.033	-0.023	-0.016	-0.008	0.03	-0.012	-0.007	0.001	-0.009	-0.032	-0.005
65	Percentage of employees working in jobs that require at least one year of on the job learning to become proficient:60% to 79%	-0.037	-0.001	0.027	-0.007	0.015	0.027	0.041	0	0.027	0	0.041	0.023	-0.008	-0.015	-0.026	-0.009	0.014	-0.05	0.031	0.029	0	0	-0.028	0.041	-0.012	-0.015	-0.012	-0.017	-0.013	-0.016	0.049	-0.02	-0.02	0.01	0.022	0.013	-0.01	-0.042	-0.017	-0.018	-0.028	0.03	0.017	-0.001	-0.012	0.007	-0.024	-0.013
66	Percentage of employees working in jobs that require at least one year of on the job learning to become proficient:80% to 99%	-0.039	-0.019	0.046	0.014	0.027	0.014	0.037	-0.013	0.056	-0.001	0.052	-0.004	0.018	-0.052	-0.023	0.044	0.039	-0.037	0.015	0.032	-0.006	0.006	-0.05	0.054	0.004	-0.014	-0.015	-0.032	-0.026	-0.027	0.061	-0.014	0.003	0.025	0	-0.007	-0.009	-0.017	-0.013	-0.012	-0.005	0.019	-0.005	-0.005	-0.006	-0.002	-0.029	-0.028
67	Percentage of employees working in jobs that require at least one year of on the job learning to become proficient:All	-0.039	-0.03	0.036	0.02	0.016	0.028	0.016	0.021	0.04	-0.042	-0.031	-0.04	0.032	-0.015	-0.001	0.014	0.034	0.122	-0.083	-0.062	0.03	-0.03	-0.004	-0.017	0.028	0	-0.023	-0.009	-0.011	-0.037	-0.05	0.088	0.054	0.026	-0.015	-0.025	-0.018	0.011	0.01	0.037	0.033	-0.03	-0.022	-0.02	-0.01	0.014	0.051	-0.069
68	Financial situation: Very good	-0.03	-0.007	0.05	-0.039	0.007	0.027	0.062	-0.016	0.049	-0.007	0.025	0.011	-0.034	0.011	-0.02	0.068	-0.022	-0.039	0.01	0.041	0.032	-0.032	-0.046	0.037	0.021	-0.003	-0.01	-0.027	-0.015	-0.022	0.006	0.027	-0.018	-0.021	0.022	0.028	0.008	-0.037	-0.011	-0.023	0.024	0.017	-0.027	-0.02	-0.013	0.01	-0.02	-0.012
69	Financial situation: Good	0.042	0.028	-0.037	-0.036	-0.027	-0.017	-0.004	-0.017	-0.03	-0.04	-0.019	0.011	-0.011	0.003	-0.005	0.012	-0.011	-0.022	0.009	0.018	0.026	-0.026	0.008	-0.013	0.005	-0.022	0.008	0.005	0.004	0.007	0.019	-0.023	-0.006	-0.015	0.015	0.009	-0.004	0.002	-0.013	0.005	0.025	-0.003	-0.018	-0.028	-0.013	-0.005	-0.027	-0.013
70	Financial situation: Neither good nor bad	-0.003	-0.014	0.013	0.04	0.023	-0.024	-0.04	0.003	-0.018	0.009	-0.009	-0.018	0.017	-0.003	0.019	-0.039	0.02	0.036	-0.014	-0.032	-0.027	0.027	0.022	-0.011	-0.019	0.011	0.006	0.004	0.003	0.014	-0.013	-0.004	0.016	0.019	-0.03	-0.021	0.009	0.021	0.018	0.015	-0.026	-0.004	0.013	0.03	0.009	-0.007	0.023	0.019
71	Financial situation: Bad	-0.023	-0.015	-0.012	0.029	-0.003	0.031	0.002	0.036	0.024	0.056	0.02	-0.003	0.029	-0.015	0.003	-0.035	0.014	0.018	-0.003	-0.022	-0.032	0.032	-0.002	0	0.002	0.019	-0.012	0.015	0.001	-0.01	-0.015	0.015	0.007	0.016	-0.008	-0.008	-0.011	0.009	-0.001	-0.013	-0.032	-0.004	0.042	0.022	0.027	0.005	0.024	0.007
72	Financial situation: Very bad	-0.028	-0.009	-0.006	0.042	0.014	0.016	-0.009	0.026	0.001	0.029	-0.003	-0.001	0.012	-0.001	0.001	-0.013	-0.001	0.023	-0.01	-0.018	-0.023	0.023	0.016	-0.009	-0.013	0.019	-0.004	0.006	0.011	0.001	-0.014	0.004	0	0.018	0.005	-0.018	-0.011	-0.003	0.019	0.012	-0.003	-0.012	0.007	0.01	-0.006	0.012	0.03	0.001
73	Change in financial situation: Improved	0.03	0.015	-0.013	-0.072	-0.041	0.015	0.054	-0.023	-0.001	-0.015	-0.016	0.033	-0.038	-0.008	-0.009	0.026	-0.011	-0.032	0.024	0.013	0.037	-0.037	-0.023	0.005	0.028	-0.012	-0.004	-0.004	0.018	0.011	0.017	-0.024	-0.016	0.001	0.008	0.008	-0.004	-0.012	-0.007	0.011	0.026	-0.004	-0.019	-0.029	-0.02	-0.008	-0.056	-0.016
74	Change in financial situation: Remained about the same	0.025	0	0.004	-0.002	0.002	-0.032	-0.02	-0.023	-0.008	-0.028	0.012	0.019	-0.006	-0.024	0.004	0.011	-0.001	-0.018	-0.006	0.034	-0.026	0.026	0.046	-0.036	-0.021	-0.018	0.001	-0.008	-0.005	0.001	0.011	-0.002	-0.001	0.002	0.006	-0.005	0.001	-0.002	-0.008	-0.025	0.003	0.016	-0.006	-0.003	-0.002	-0.002	0.024	0.014
75	Change in financial situation: Worsened	-0.056	-0.015	0.009	0.073	0.04	0.019	-0.033	0.048	0.01	0.044	0.003	-0.052	0.044	0.033	0.005	-0.037	0.011	0.05	-0.018	-0.047	-0.009	0.009	-0.025	0.033	-0.006	0.031	0.002	0.012	-0.012	-0.011	-0.028	0.026	0.017	-0.002	-0.015	-0.003	0.003	0.014	0.015	0.015	-0.03	-0.013	0.025	0.033	0.022	0.01	0.031	0.001
76	Change in financial situation: Not applicable	0.011	0.001	-0.012	-0.004	-0.01	-0.001	0.006	-0.006	-0.007	-0.001	-0.005	-0.009	0.004	0	-0.001	0.012	0.002	-0.002	0.008	-0.007	0.002	-0.002	0	-0.001	0.002	-0.004	0.003	0.007	-0.006	-0.009	0.003	0.003	0.009	-0.012	0.001	-0.002	0.004	0.011	-0.003	-0.001	0.007	-0.007	0.005	-0.006	-0.003	-0.001	-0.006	-0.01
77	Planning and execution of daily tasks decided by: The employee undertaking the tasks	0.015	-0.026	0.006	0.019	-0.004	-0.013	0.011	-0.025	-0.004	-0.031	-0.008	-0.062	-0.029	0.006	-0.006	0.03	0.074	0.064	-0.037	-0.041	-0.006	0.006	-0.005	0.024	-0.025	0.005	-0.001	-0.005	-0.013	-0.005	-0.004	0.013	-0.005	-0.042	-0.006	0.023	0.028	0.009	0.013	0.029	-0.018	0.004	-0.006	0.001	0.021	-0.007	0.006	-0.063
78	Planning and execution of daily tasks decided by:Managers or supervisors	0.044	0.034	-0.051	0.009	-0.005	-0.046	-0.131	0.047	-0.072	-0.024	-0.043	0.088	0.073	-0.021	0.029	-0.07	-0.113	0.003	-0.002	-0.002	0.035	-0.035	0.088	-0.107	0.008	0.016	0.014	0.027	0.04	0.018	-0.043	-0.004	0.041	0.09	-0.017	-0.07	-0.044	0.008	0.013	-0.004	0.022	-0.033	0.007	0.008	0.011	0.006	0.068	0.105
79	Planning and execution of daily tasks decided byBoth employees and managers or supervisors	-0.051	-0.023	0.049	-0.018	0.007	0.053	0.128	-0.037	0.075	0.038	0.048	-0.061	-0.062	0.019	-0.027	0.058	0.081	-0.032	0.018	0.021	-0.033	0.033	-0.088	0.098	0.003	-0.018	-0.014	-0.025	-0.034	-0.016	0.045	-0.002	-0.04	-0.073	0.019	0.061	0.032	-0.012	-0.019	-0.009	-0.014	0.031	-0.004	-0.008	-0.021	-0.003	-0.072	-0.079
80	FROTATE==Yes, most do	-0.008	-0.011	-0.001	0.002	-0.008	0.019	-0.005	0.027	-0.01	0.012	-0.016	0.04	0.012	-0.004	-0.007	-0.038	-0.027	0.057	-0.046	-0.019	0.006	-0.006	0.027	-0.053	0.03	0.013	-0.004	0.003	-0.006	0.002	-0.038	0.036	0.024	0.005	-0.023	-0.015	0	0.032	0.017	0.026	-0.001	-0.008	-0.013	0.003	0.016	0.009	0.061	0.009
81	FROTATE==Yes, some do	-0.007	0.039	-0.006	-0.031	0.007	0	-0.009	0.007	0.01	0.011	0.033	0.036	-0.003	-0.011	-0.014	0.004	-0.021	-0.09	0.051	0.059	-0.008	0.008	-0.025	0.034	-0.007	-0.023	-0.006	0.009	0.016	0.02	0.049	-0.061	-0.027	-0.001	0.022	0.008	0	-0.026	-0.014	-0.029	0.006	0.021	-0.004	-0.01	-0.021	0.001	-0.066	0.012
82	FROTATE==No, none do	0.018	-0.027	0.003	0.031	0	-0.021	0	-0.026	-0.017	-0.024	-0.031	-0.076	-0.006	0.028	0.032	0.025	0.03	0.05	-0.019	-0.046	0.016	-0.016	0.033	-0.017	-0.029	0.014	0.007	-0.011	-0.001	-0.02	-0.019	0.028	0.013	-0.005	-0.007	-0.005	0.007	0.009	0.006	0.004	-0.001	-0.02	0.016	0.01	0.012	-0.005	0.034	0
83	FROTATE==No, the high level of required skills or expertise prevents employees f	-0.005	-0.012	0.009	0.005	0	0.006	0.029	-0.016	0.028	0	0.017	-0.007	-0.004	-0.021	-0.018	0.011	0.038	-0.005	0.01	-0.006	-0.025	0.025	-0.059	0.056	0.015	0	0.006	-0.004	-0.022	-0.01	0	0.013	-0.009	0.003	0.007	0.018	-0.012	-0.019	-0.012	0.007	-0.01	0.008	0.003	-0.002	-0.007	-0.007	-0.033	-0.042
84	Percentage of employees who have received on the job training: None at all	0.057	-0.021	-0.044	0.058	-0.013	-0.053	-0.043	-0.03	-0.096	-0.074	-0.099	-0.036	0.041	0.032	0.01	-0.028	-0.012	0.21	-0.117	-0.141	0.02	-0.02	0.106	-0.083	-0.051	0.047	-0.02	-0.003	-0.016	-0.049	-0.135	0.166	0.027	0.038	-0.019	-0.041	-0.007	0.01	0.034	0.034	0	-0.034	0.001	0.023	0.027	0.002	0.157	-0.02
85	Percentage of employees who have received on the job training: Less than 20%	0	0.035	-0.025	-0.002	0.007	-0.009	-0.011	-0.001	0.041	0.051	0.06	0.069	-0.001	-0.051	0.007	0.002	-0.032	-0.116	0.08	0.058	-0.055	0.055	0.012	0.002	-0.021	-0.013	0.017	-0.008	-0.022	-0.005	0.078	-0.067	-0.023	0.025	0.015	-0.012	-0.018	-0.009	-0.017	-0.054	-0.024	0.028	0.036	0.001	0.002	0.001	-0.034	0.073
86	Percentage of employees who have received on the job training: 20% to 39%	-0.021	0.021	0.001	-0.014	0.009	0.015	0.009	0.011	0.005	0.004	0.027	0	0.001	0.009	-0.003	0.008	-0.013	-0.04	0.015	0.036	0.014	-0.014	-0.003	0.016	-0.016	-0.013	0.001	0.005	0.003	0.028	0.029	-0.044	-0.01	-0.011	0.019	0.012	0.006	-0.026	-0.017	-0.004	-0.019	0.024	0.005	-0.007	-0.012	0.001	-0.034	0.018
87	Percentage of employees who have received on the job training: 40% to 59%	-0.035	0.007	0.014	-0.004	0.013	0.026	0.02	0.016	0.02	0.007	0.035	-0.016	-0.006	0.006	-0.01	0.012	0.016	-0.045	0.014	0.045	0.004	-0.004	-0.04	0.039	0.009	-0.023	0.003	0.009	0.018	0.034	0.024	-0.049	-0.006	-0.019	0.028	0.016	-0.008	-0.02	-0.01	0.003	0.011	0.01	-0.022	-0.009	-0.012	-0.01	-0.041	-0.007
88	Percentage of employees who have received on the job training: 60% to 79%	-0.037	0.002	0.035	-0.011	0.02	0.019	0.01	0.016	0.039	0.021	0.036	0.014	-0.015	-0.018	-0.008	-0.002	0.019	-0.08	0.039	0.062	0.01	-0.01	-0.051	0.054	0.006	-0.015	-0.012	-0.004	0.003	0.022	0.044	-0.047	-0.016	-0.006	0.016	0.021	-0.007	-0.025	-0.015	-0.023	0.008	0.011	-0.001	-0.012	-0.007	-0.007	-0.048	-0.017
89	Percentage of employees who have received on the job training: 80% to 99%	-0.029	0.009	0.02	-0.004	0.019	0.012	0.018	0	0.037	0.043	0.033	-0.005	-0.01	-0.027	0.001	0.008	0.037	-0.089	0.055	0.052	0.002	-0.002	-0.054	0.05	0.015	-0.015	-0.011	-0.001	0.004	0.009	0.059	-0.056	-0.022	-0.009	-0.009	0.019	0.009	0.006	-0.019	-0.007	0.002	0.005	0.003	-0.008	-0.011	0	-0.058	-0.025
90	Percentage of employees who have received on the job training: All	0.027	-0.046	0.027	-0.031	-0.035	0.011	0.016	0.001	-0.01	-0.024	-0.053	-0.029	-0.022	0.034	-0.003	0.006	0.012	0.077	-0.043	-0.052	0.014	-0.014	-0.025	-0.023	0.07	0.013	0.012	0.003	0.018	-0.013	-0.049	0.039	0.032	-0.031	-0.04	0.007	0.025	0.048	0.026	0.041	0.028	-0.033	-0.028	0.001	0.001	0.007	0	-0.041
[truncated: 42 more columns]
